# Supplementary material for: Bi/C nanosheet microspheres with an open pore structure as anodes for sodium ion batteries with high capacity, excellent rate performance and long cycle life
Source: Royal Society of Chemistry journal article supplement (doi:10.1039/d1ta06948a), 2021-01-01
Supplement: d1ta06948a1.pdf [file d1ta06948a1.pdf]

## Supporting Information

### **Bi/C Nanosheet Microspheres with Open Pore Structure as Anodes for Sodium Ion Batteries with High Capacity, Excellent Rate Performance and Long Cycle Life**

Ying Li <sup>a</sup>, Xia Zhong <sup>a</sup>, Xianwen Wu <sup>b</sup>, Mingqi Li <sup>\*a</sup>, Wei Zhang <sup>a</sup> and Dan Wang <sup>c</sup>

<sup>a</sup> College of Chemistry and Chemical Engineering, China West Normal University, Chemical Synthesis and Pollution Control Key Laboratory of Sichuan Province, Nanchong 637009, P. R. China

<sup>b</sup> School of Chemistry and Chemical Engineering, Jishou University, Jishou 416000, P. R. China

<sup>c</sup> Department of Chemical Engineering, School of Chemistry and Chemical Engineering, Chongqing University, Chongqing 400044, P. R. China

\*Email: lmingq888@163.com

Tab. S1. Electrochemical performance comparison

| Material                                              | First reversible capacity [mA g <sup>-1</sup> ] (current density [A g <sup>-1</sup> ]) | ICE /% | Rate capability [mA g <sup>-1</sup> ] (current density [A g <sup>-1</sup> ]) | Long cycle life [mA g <sup>-1</sup> ] (cycle number, current density [A g <sup>-1</sup> ]) | Ref. |
|-------------------------------------------------------|----------------------------------------------------------------------------------------|--------|------------------------------------------------------------------------------|--------------------------------------------------------------------------------------------|------|
| Multicore–Shell Bi@N-doped Carbon Nanospheres         | 355 (1)                                                                                | 36.5   | 262 (5), 252 (10), 240 (20), 211 (50)                                        | 235 (2000, 10)                                                                             | [1]  |
| Free-standing bismuthene/graphene                     | /                                                                                      | /      | ~263 (1.2)                                                                   | 317 (1000, 0.71)                                                                           | [2]  |
| Bismuth nanoparticle@carbon                           | 315 (0.8)                                                                              | 50.3   | 232(60)                                                                      | 265 (30000, 8)                                                                             | [3]  |
| Bi@Graphite                                           | 164 (0.16)                                                                             | 74.5   | 110 (48)                                                                     | 144 (10000, 32)                                                                            | [4]  |
| C <sub>PVP + C<sub>2</sub>H<sub>2</sub></sub> /Bi/rGO | ~420 (0.1)                                                                             | 76.0   | 373 (5), 359 (10), 322 (20), 188 (50)                                        | 327.6 (1200, 5)                                                                            | [5]  |
| Bi nanoflakes on Ni foam                              | 377 (0.02)                                                                             | /      | 318 (0.4), 282 (0.8), 240 (1.2), 206 (2.0)                                   | 302.4 (100, 0.2)                                                                           | [6]  |
| bismuth nanosheets on carbon cloth                    | 451 (0.05)                                                                             | 61.2   | ~120 (2)                                                                     | 240 (300, 0.2)                                                                             | [7]  |
| Bi nanorod bundles                                    | 367 (0.05)                                                                             | 55     | 102 (2)                                                                      | 302 (150, 0.05)                                                                            | [8]  |
| This work                                             | 426 (0.1)                                                                              | 73.8   | 396 (0.2), 395 (5), 392 (10), 381 (20)                                       | 361 (10000, 5)                                                                             |      |

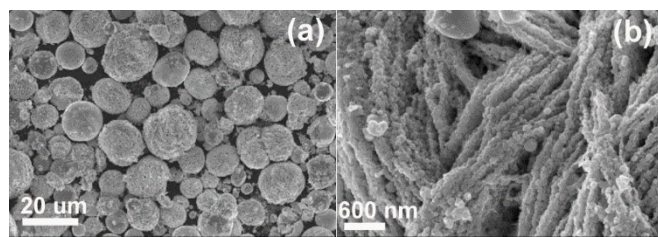

Fig. S1. SEM images of pure Bi nanosheet microspheres.

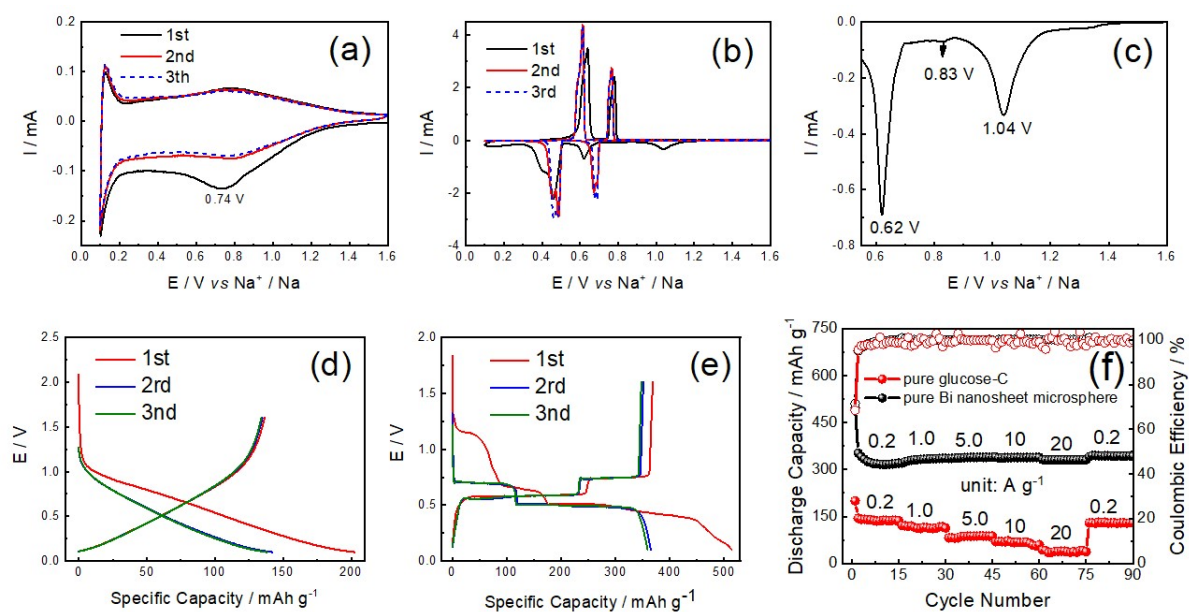

Fig. S2. CV curves of (a) pure glucose-C and (b) pure Bi nanosheet microspheres at  $0.2 \text{ V s}^{-1}$ ; (c) Magnified first cathode scan curve of pure Bi nanosheet microspheres; Charge and discharge profiles of (d) pure glucose-C and (e) pure Bi nanosheet microspheres in the first three cycles at  $100 \text{ mA g}^{-1}$ ; (f) Rate capability of pure glucose-C and pure Bi nanosheet microspheres.

Table S2. Thickness change of the ops-Bi/C nanosheet microsphere electrode during alloying and dealloying

| Electrode number                                      | 1     | 2  | 3  | 4   | 5  | 6  |
|-------------------------------------------------------|-------|----|----|-----|----|----|
| Thickness before cycling [ $\mu\text{m}$ ]            | 31    | 32 | 32 | 32  | 30 | 31 |
| Thickness after discharged to 0.1 V [ $\mu\text{m}$ ] | 36    | 38 | 36 | /□  | /□ | /□ |
| Thickness after charged to 1.6 V [ $\mu\text{m}$ ]    | /□    | □/ | /□ | 33  | 30 | 32 |
| Average relative thickness change (%)                 | 16.0□ |    |    | 2.1 |    |    |

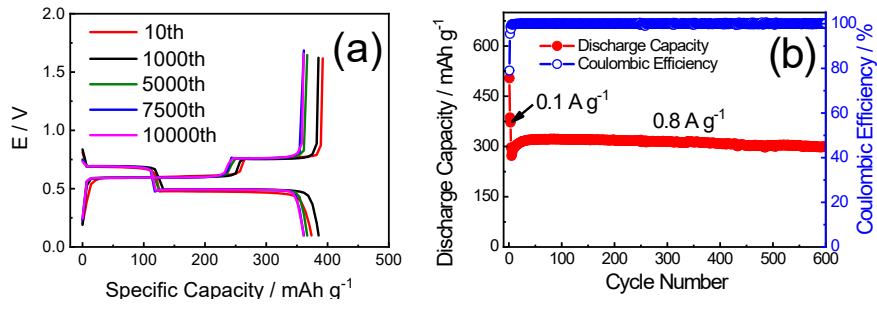

Fig. S3. Charge and discharge profiles of the ops-Bi/C nanosheet microspheres electrode in different cycles at  $5 \text{ A g}^{-1}$  (a) and cycle performance of the ops-Bi/C nanosheet microspheres electrode with a high active material loading of  $10.58 \text{ mg cm}^{-2}$  (b).

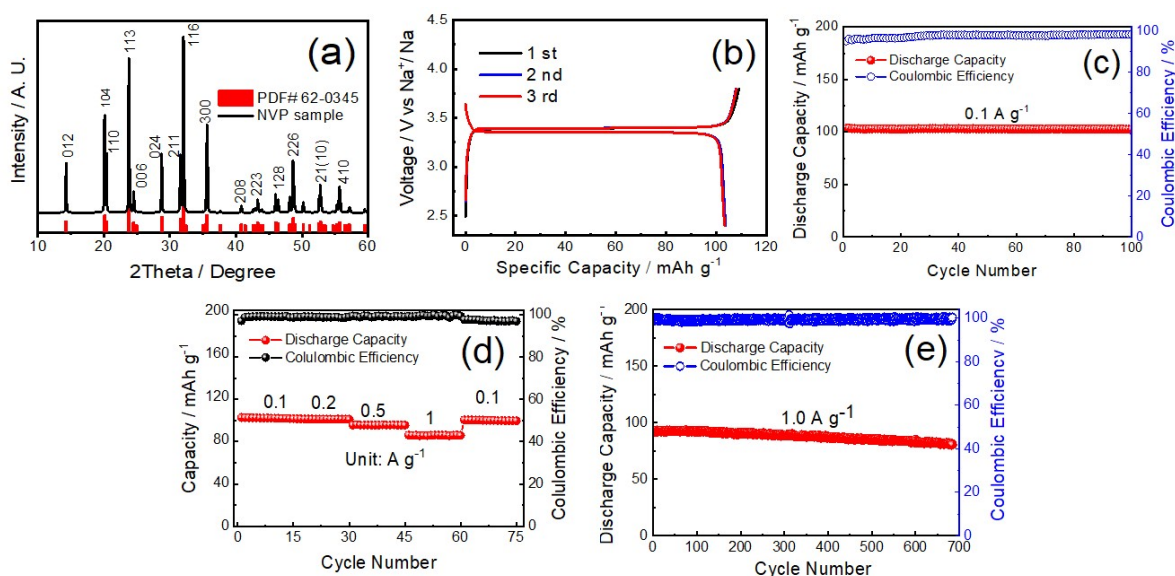

Fig. S4. XRD pattern of commercial  $\text{Na}_3\text{V}_2(\text{PO}_4)_3$  (a); Electrochemical behaviours of commercial  $\text{Na}_3\text{V}_2(\text{PO}_4)_3$  in a sodium ion half cell: charge-discharge profiles (b), cycle performance at  $0.1 \text{ A g}^{-1}$ (c), rate capability (d) and long cycle life at  $1.0 \text{ A g}^{-1}$  (e).

## References

- [1] H. Yang, R. Xu, Y. Yao, S. Ye, X. Zhou and Y. Yu, *Adv. Funct. Mater.* 2019, 29, 1809195.
- [2] J. Zhou, J. Chen, M. Chen, J. Wang, X. Liu, B. Wei, Z. Wang, J. Li, L. Gu, Q. Zhang, H., *Adv. Mater.* 2019, 31, 807874.
- [3] P. Xiong, P. Bai, A. Li, B. Li, M. Cheng, Y. Chen, S. Huang, Q. Jiang, X. H. Bu and Y. Xu, *Adv. Mater.* 2019, 31, 1904771.
- [4] J. Chen, X. Fan, X. Ji, T. Gao, S. Hou, X. Zhou, L. Wang, F. Wang, C. Yang, L. Chen and C. Wang, *Energ. Environ. Sci.* 2018, 11, 1218.
- [5] C. Hu, Y. Zhu, G. Ma, F. Tian, Y. Zhou, J. Yang and Y. Qian, *Electrochim. Acta*, 2021, 365, 137379.
- [6] L. Wang, C. Wang, F. Li, F. Cheng and J. Chen, *Chemical Commun.* 2018, 54, 38.
- [7] S. Liu, Z. Luo, J. Guo, A. Pan, Z. Cai and S. Liang, *Electrochem. Commun.* 2017, 81, 10.
- [8] S. Liu, J. Feng, X. Bian, J. Liu and H. Xu, *J. Mater. Chem. A* 2016, 4, 10098.
